# Supplementary material
Source: publisher site journal article supplement (http://oneecosystem.pensoft.net/article/download/suppl/3338366/)
Supplement: Supplementary file 1

## Regional classifications of Member States


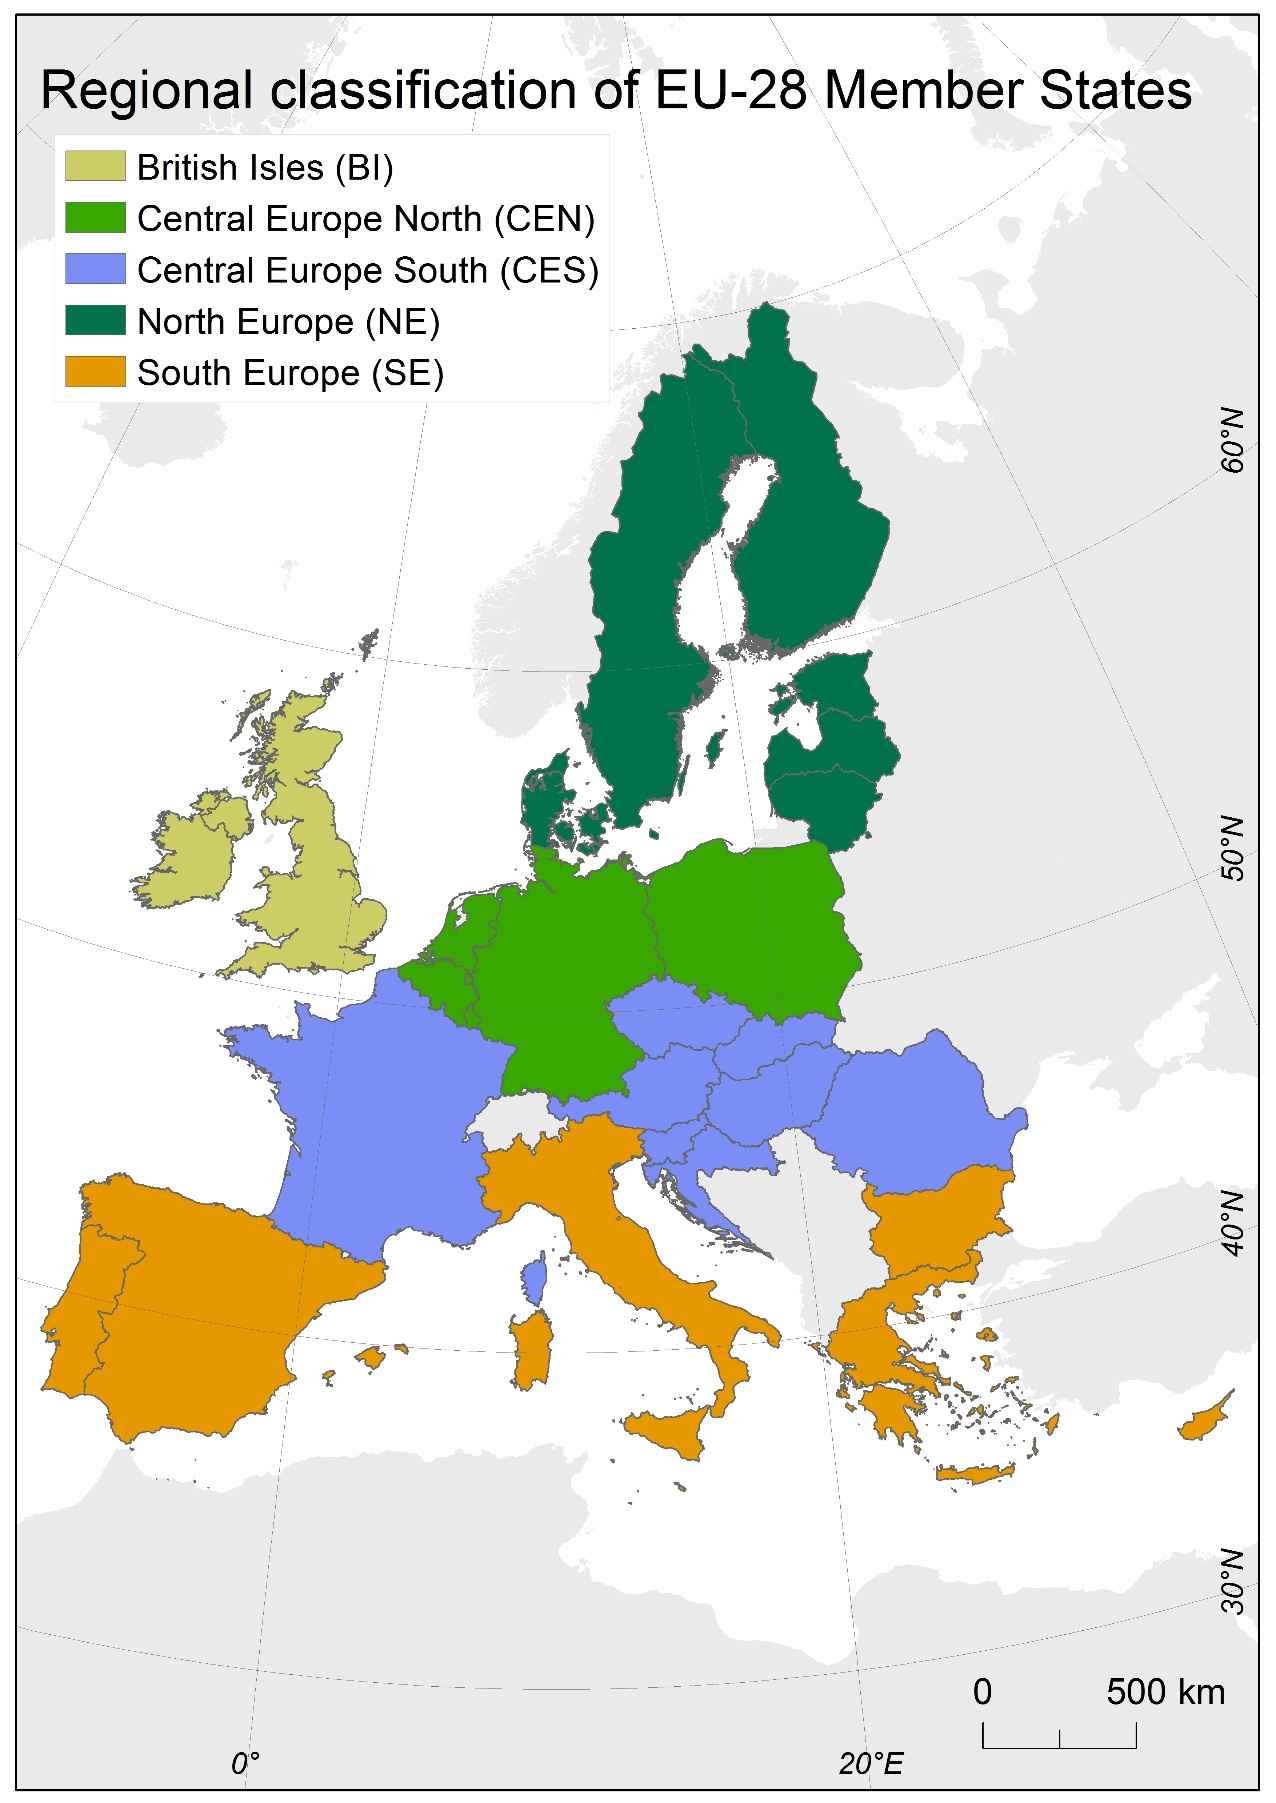


Figure S. 2: Regional classification of the 28 EU Member States, updated from [Ciscar *et al.* (2011](#_ENREF_15)).

### Reference

Ciscar Martinez JC, Iglesias A, Feyen L, Szabó L, Van Regemorter D, Amelung B, Nicholls R, Watkiss P, Christensen OB, Dankers R, Garrote L, Goodess CM, Hunt A, Moreno A, Richards J, Soria A (2011) Physical and economic consequences of climate change in Europe. Proceedings of the National Academy of Sciences of the United States of America 108 (7): 2678‑2683. URL: <http://www.scopus.com/inward/record.url?eid=2-s2.0-79952599340&partnerID=40&md5=647d8e90e3e4421d0fd09497096e84ad>
